# Supplementary material for: Enhancing the Production of Pinene in Escherichia coli by Using a Combination of Shotgun, Product-Tolerance and I-SceI Cleavage Systems
Source: MDPI journal article supplement (doi:10.3390/biology11101484), 2022-10-10
Supplement: s1 [file s1]

**Table S1.** The primers used in this study.

| Name            | Sequence (5'-3')                 | Purpose                          |
|-----------------|----------------------------------|----------------------------------|
| EcoRI-acrB-UF   | GACGAATTCgcttaatccaaacgctat      | PCR for acrB-up homologous arm   |
| BamHI-acrB-UR   | GTCGGATCCgtcttaacggctcgtttaag    |                                  |
| Sall-acrB-DF    | GTCGTCGAGatgcctaatttcttcatcgatcg |                                  |
| HindIII-acrB-DR | AGTAAGCTTatccgcatcagtagcagactc   | PCR for acrB-down homologous arm |
| EcoRI-flg-UF    | GACGAATTCttgtcggcaactattccaac    |                                  |
| BamHI-flg-UR    | GTCGGATCCtgagctatcccgtcagcgattag |                                  |
| Sall-flg-DF     | GTCGTCGAGatggatcacgcaatttatac    | PCR for flgF-down homologous arm |
| HindIII-flg-DR  | AGTAAGCTTcattacgcgtatacccttcg    |                                  |
| EcoRI-ndk-UF    | GACGAATTCcgactttgccgttgcaatca    |                                  |
| BamHI-ndk-UR    | GTCGGATCCttttacctctgtaaatgttc    | PCR for ndk-up homologous arm    |
| Sall-ndk-DF     | GTCGTCGAGatggctattgaacgtacttttc  |                                  |
| HindIII-ndk-DR  | AGTAAGCTTtaccagccagtgctgttgcc    |                                  |
| Q-acrBF         | atatcgcgaggttcagggtg             | qPCR for acrB                    |
| Q-acrBR         | agctgtggcctttaccggg              |                                  |
| Q-flgFF         | gcgtaatggcagcattcagg             |                                  |
| Q-flgFR         | gattgagcgccgagattgtg             | qPCR for flgF                    |
| Q-ndkF          | ttccatcatcaaaccgaacg             |                                  |
| Q-ndkR          | aaccagaccatcaaagaacg             |                                  |
| Q-cysGF         | ttgtcggcggtggtgatgtc             | qPCR for cysG                    |
| Q-cysGR         | atgcggtgaactgtggaataaacg         |                                  |

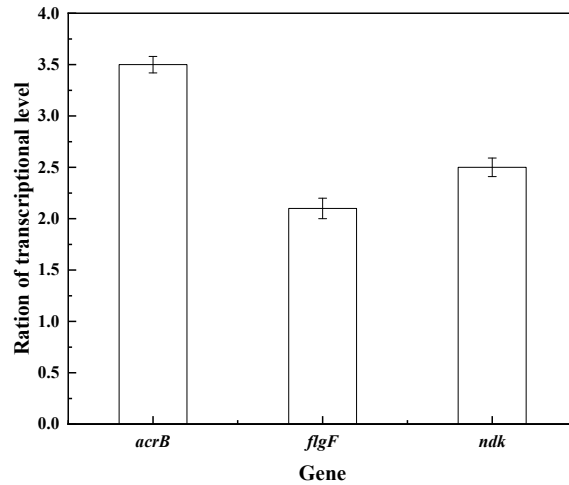

**Figure S1.** The relative transcriptional levels of the *acrB*, *flgF* and *ndk* genes in *E. coli* MG1655B, MG1655BF and MG1655BFN compared with those in *E. coli* MG1655, respectively. The total RNA from *E. coli* cells for 30 h in shake flasks was isolated using an RNA extraction kit (Tiangen, China), RNase-free gDNaseI was treated during the isolation procedure. The first-strand cDNA was synthesized using an All-in-One™ First-Strand cDNA Synthesis kit (GeneCopoeia, Guangzhou, China). Quantitative real-time PCR (qRT-PCR) was performed with the All-in-One™ qPCR Mix kit (GeneCopoeia) by an iCycler iQ5 Real Time PCR system (Bio-Rad Laboratories, California, USA). follows: 95 °C for 10 min, followed by 45 cycles of denaturation at 95 °C for 10 s, annealing at 60 °C for 20 s, and extension at 72 °C for 15 s. The expression levels were analyzed by the  $2^{-\Delta\Delta Ct}$  method described by Livak and Schmittgen [1] and normalized by *cysG* gene expression.

Supple

P37-S-Kan-S-P37 sequence (5'-3')

cttacatgaaaaaggttcttgacattttaaatccatgtggtatatgtcatttttctatttcggaattaaggaggtaata  
aattagggga

P37 promoter

S

site

Taacagggtaattctgatcaagagacaggatgaggatcgttcgcattgaacaagatggattgcacgcag  
gttctccggccgcttgggtggagaggctattcggctatgactgggcacaacagacaatcggctgctctgatgcc  
gccgtgtccggctgtcagcgcagggcgcccggttctttgtcaagaccgacctgtccggtgccctgaatgaa  
ctccaagacgaggcagcgcggctatcgtggctggccacgacggcgcttccttgccagctgtgctcgacgttgt  
cactgaagcgggaagggactggctgctattgggcgaagtgccggggcaggatctcctgtcatctcaccttgctc  
ctgccgagaaagtatccatcatggctgatgcaatgcggcggtgcatacgcttgatccggctacctgccattcg  
accaccaagcgaaacatcgcatcgagcgagcacgtactcggatggaagccggtcttgtcgatcaggatgatct  
ggacgaagagcatcaggggctcgcgccagccgaactgttcgccaggctcaaggcgcggtatgccgacggcg  
aggatctcgtcgtgacctatggcgatgcctgcttgccgaatatcatggtggaaaatggccgcttttctggattcat  
cgactgtggccggctgggtgtggcggaccgctatcaggacatagcgttggtacctgatattgctgaagag  
cttggcggcgaatgggctgaccgcttctcgtgctttacggtatcgccgctcccgattcgcagcgcacgccttct  
atgccttcttgacgagttcttctgaccggaattgccagctggggcgccctctggttaagggttggaagccctgca  
aagtaaactggatggcttcttgcgccaaggatctgatggcgcaggggatcaagatagggataacagggtaa  
tcttacatg

Kan

S site

Aaaaaggttcttgacattttaaatccatgtggtatatgtcattttctatttcggaattaaggaggtataaat

P37 promoter
